# Supplementary material
Source: PubMed Central journal article supplement (PMC9825745)
Supplement: btac726_supplementary_data.pdf [file btac726_supplementary_data.pdf]

## SUPPLEMENTARY TABLES AND FIGURES

| <b>Tool</b>            | <b>Reference Database</b>                                                | <b>Multi-omic pathway analysis with mixed ID input</b> | <b>Multi-omic pathway analysis using multiple knowledge sources</b> | <b>Inclusion of extensive chemical/lipid annotations</b> |
|------------------------|--------------------------------------------------------------------------|--------------------------------------------------------|---------------------------------------------------------------------|----------------------------------------------------------|
| <b>RaMP</b>            | HMDB, Reactome, Wikipathways                                             | Yes                                                    | Yes                                                                 | Yes                                                      |
| <b>MetaboAnalyst</b>   | KEGG, Pathbank                                                           | No                                                     | Yes                                                                 | No                                                       |
| <b>3Omics</b>          | KEGG, HumanCyc                                                           | No                                                     | Yes                                                                 | No                                                       |
| <b>IMPALA</b>          | 11 total including KEGG, Reactome, BioCyc, Wiki-Pathways, SMPDB          | No                                                     | Yes                                                                 | No                                                       |
| <b>ConsensusPathDB</b> | 30 different sources including Reactome, KEGG, WikiPathways and HumanCyc | No                                                     | Yes                                                                 | No                                                       |
| <b>MetaBox</b>         | KEGG                                                                     | No                                                     | No                                                                  | Yes                                                      |
| <b>PathNet</b>         | KEGG                                                                     | No                                                     | No                                                                  | No                                                       |
| <b>GO-Elite</b>        | GO, WikiPathways, PathwayCommons, KEGG                                   | Yes                                                    | Yes                                                                 | No                                                       |

**Supplementary Table 1:** Publicly available tools for functional enrichment analysis of metabolomic and transcriptomic data

| RaMP package function   | Query result                                                                                                                 | Page of GUI used                                                                                                              | Tables used                          | API link                                                                                                                    |
|-------------------------|------------------------------------------------------------------------------------------------------------------------------|-------------------------------------------------------------------------------------------------------------------------------|--------------------------------------|-----------------------------------------------------------------------------------------------------------------------------|
| getAnalyteFromPathway() | A dataframe of analytes associated with input pathway(s)                                                                     | <a href="https://ramp-alpha.ncats.io/analytes-from-pathways">https://ramp-alpha.ncats.io/analytes-from-pathways</a>           | source, analytehaspathway, pathway   | <a href="https://rampdb.nih.gov/api/analytes-from-pathways">https://rampdb.nih.gov/api/analytes-from-pathways</a>           |
| getPathwayFromAnalyte() | A dataframe of pathways associated with the input analyte(s)                                                                 | <a href="https://ramp-alpha.ncats.io/pathways-from-analytes">https://ramp-alpha.ncats.io/pathways-from-analytes</a>           | source, analytehaspathway, pathway   | <a href="https://rampdb.nih.gov/api/pathways-from-analytes">https://rampdb.nih.gov/api/pathways-from-analytes</a>           |
| getMetaFromOnto()       | A dataframe of metabolites associated with the input ontology/ies                                                            | <a href="https://ramp-alpha.ncats.io/metabolites-from-ontologies">https://ramp-alpha.ncats.io/metabolites-from-ontologies</a> | source, analytehasontology, ontology | <a href="https://rampdb.nih.gov/api/metabolites-from-ontologies">https://rampdb.nih.gov/api/metabolites-from-ontologies</a> |
| getOntoFromMeta()       | A dataframe of ontologies associated with the the input metabolite(s)                                                        | <a href="https://ramp-alpha.ncats.io/ontologies-from-metabolites">https://ramp-alpha.ncats.io/ontologies-from-metabolites</a> | source, analytehasontology, ontology | <a href="https://rampdb.nih.gov/api/ontologies-from-metabolites">https://rampdb.nih.gov/api/ontologies-from-metabolites</a> |
| rampFastCata()          | A dataframe of reaction partners associated with the input analyte(s)                                                        | <a href="https://ramp-alpha.ncats.io/common-reaction-analytes">https://ramp-alpha.ncats.io/common-reaction-analytes</a>       | source, catalyzed, analytesynonym    | <a href="https://rampdb.nih.gov/api/common-reaction-analytes">https://rampdb.nih.gov/api/common-reaction-analytes</a>       |
| getChemicalProperties() | A dataframe of chemical properties associated with the input metabolite. Includes InCHI, InCHIKey, formula, mass, and SMILES | <a href="https://ramp-alpha.ncats.io/properties-from-metabolites">https://ramp-alpha.ncats.io/properties-from-metabolites</a> | chem_props                           | <a href="https://rampdb.nih.gov/api/chemical-properties">https://rampdb.nih.gov/api/chemical-properties</a>                 |
| chemicalClassSurvey()   | A dataframe of ClassyFire chemical classes (up to level 4) associated with the input metabolite(s) of interest               | <a href="https://ramp-alpha.ncats.io/classes-from-metabolites">https://ramp-alpha.ncats.io/classes-from-metabolites</a>       | source, metabolite_class             | <a href="https://rampdb.nih.gov/api/chemical-classes">https://rampdb.nih.gov/api/chemical-classes</a>                       |

**Supplementary Table 2:** Queries supported by RaMP 2.0, including MySQL queries, corresponding R package functions, and API links

| <b>HMDBOntologyType<br/>(Parent Term)</b> | <b>Number of Distinct<br/>Descendant<br/>Ontology Terms</b> | <b>Notes on captured descendant term</b>                                                                                                                  | <b>Example terms</b>                                      |
|-------------------------------------------|-------------------------------------------------------------|-----------------------------------------------------------------------------------------------------------------------------------------------------------|-----------------------------------------------------------|
| Source                                    | 10                                                          | Specific endpoint terms reported:<br>Endogenous, Food, Plant, Animal, Microbe,<br>Synthetic, Environmental, Saccharomyces<br>cerevisiae, Fungi, Exogenous | Endogenous, Food, Plant,<br>Animal                        |
| Biofluid and excreta                      | 14                                                          | Capturing all descendent terms                                                                                                                            | Saliva, Feces, Urine, Blood                               |
| Organ and<br>components                   | 34                                                          | Capturing all descendent terms                                                                                                                            | Prostate, Brain, Liver, Intestines                        |
| Tissue and<br>substructures               | 16                                                          | Capturing all descendent terms                                                                                                                            | Muscle, Placenta, Hepatic<br>tissue, Epidermis            |
| Subcellular                               | 16                                                          | Capturing all descendent terms                                                                                                                            | Cytoplasm, Membrane,<br>Mitochondria, Nucleus             |
| Health condition                          | 465                                                         | Capturing all descendent terms                                                                                                                            | Kidney disease, Obesity,<br>Cancer, Schizophrenia         |
| Industrial application                    | 144                                                         | Capturing all descendent terms                                                                                                                            | Pharmaceutical, Surfactant,<br>Emulsifier, Anticonvulsant |

**Supplementary Table 3:** Portions of the HMDB Chemical Functional Ontology incorporated into RaMP

A.

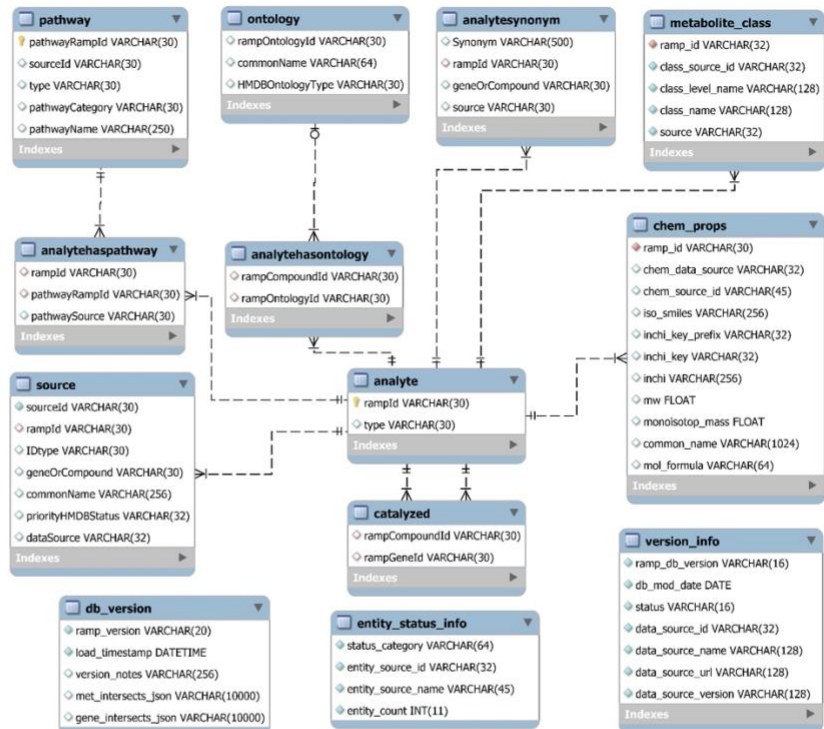

B.

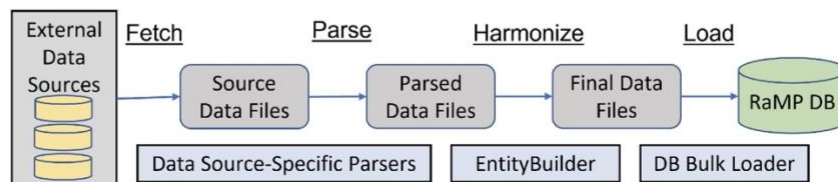

**Supplementary Figure 1: A)** RaMP-DB 2.0 Schema (and data models). **B)** Overview of the process underlying the backend code used to create RaMP .

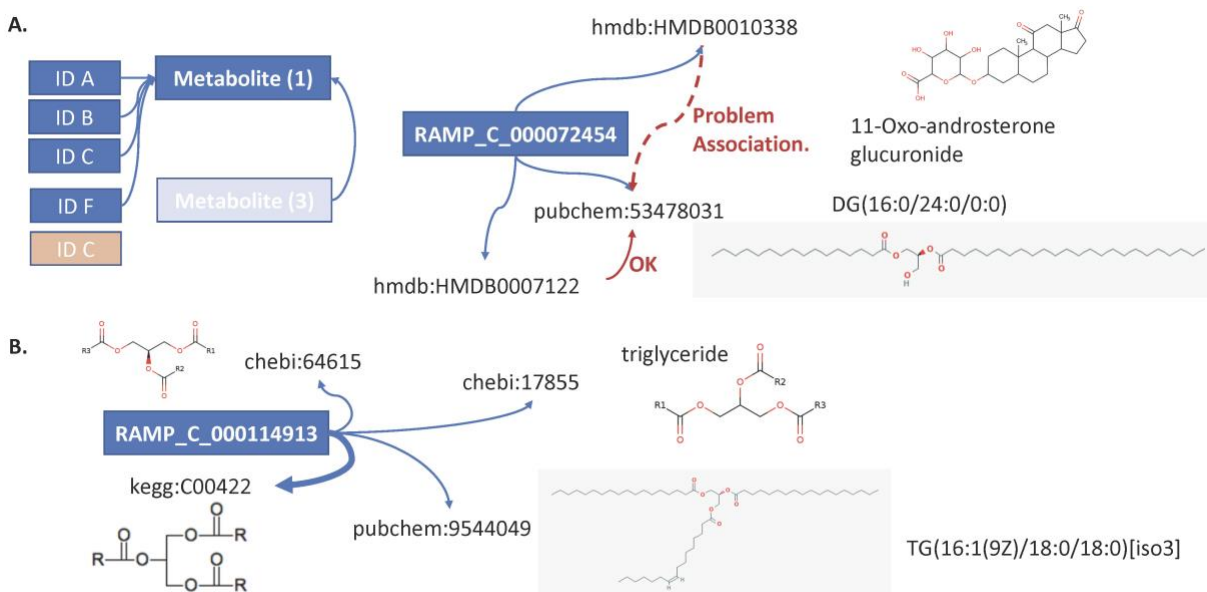

**Supplementary Figure 2:** Example errors in mappings. A) Two completely different structures are mapping to the same PubChem ID. B) Specific structures are mapping to generic structures (triglycerides with R groups rather than specific chains). 118 of 125 HMDB triglycerides map to the generic KEGG triglyceride ID (C00422).
